# Supplementary material
Source: MDPI journal article supplement (https://www.mdpi.com/2076-3271/9/2/43)
Supplement: s1 [file s1]

## Misleading HbA1c Measurement in Diabetic Patients with Hemoglobin Variants

Manthana Mitchai<sup>1\*</sup>, Nattakarn Suwansaksri<sup>2</sup>, Suphakdee Seansee<sup>1</sup>, Jindamanee Saenboonsiri<sup>1</sup>, Putthichai Kraitree<sup>1</sup>, Jirasak Piyapromdee<sup>2</sup>, Atit Silsirivanit<sup>3</sup>

<sup>1</sup> Medical Molecular Biology Center, Department of Clinical Pathology, Khon Kaen Hospital, Ministry of Public Health, Khon Kaen, 40000, Thailand; (M.M.) manthanakkh@gmail.com, (S.S.) suphakku@yahoo.com, (J.S.) sebonii@yahoo.com, (P.K.) putthichai3608@gmail.com

<sup>2</sup> Department of Internal Medicine, Khon Kaen Hospital, Ministry of Public Health, Khon Kaen, 40000, Thailand; (N.S.) natta.suwan@gmail.com, (J.P.) jirasak21@gmail.com

<sup>3</sup> Department of Biochemistry, and Center for Translational Medicine, Faculty of Medicine, Khon Kaen University, Khon Kaen, 40002, Thailand; (A.S.) atitsil@kku.ac.th

\* Correspondence: manthanakkh@gmail.com; Tel.: +66-43-009900 ext.4001

**Table S1.** Demographic data of patients

| Characteristics                                        | Values       |
|--------------------------------------------------------|--------------|
| Sex (N)                                                |              |
| Male                                                   | 385 (45.4%)  |
| Female                                                 | 461 (54.6%)  |
| Age (mean± SD), years                                  | 58.6 ± 14.6  |
| Fasting blood sugar (mean± SD), mg/dl                  | 153.0 ± 85.8 |
| HbA1c (mean± SD), %                                    |              |
| CE                                                     | 8.3± 2.8     |
| TINIA                                                  | 8.6± 2.6     |
| Hematology parameter (mean± SD)                        |              |
| Red blood cell count, ×10 <sup>6</sup> cells/ul        | 4.4±0.9      |
| Hemoglobin (Hb), g/dl                                  | 11.8±2.8     |
| Hematocrit (Hct), %                                    | 35.3±6.8     |
| Mean corpuscular volume (MCV), fl                      | 80.6±8.6     |
| Mean corpuscular hemoglobin (MCH), pg                  | 27.9±3.2     |
| Mean corpuscular hemoglobin concentration (MCHC), g/dl | 33.5±1.7     |

**Table 2.** Pearson correlation blood parameters in patients with diabetes.

|           | A1C<br>(TINIA)         | A1C<br>(CE)            | %HbA                   | %HbA2                   | %HbE                    | %HbF                    | RBC count               | Hb                      | Hct                     | MCV                     | MCH                     | MCHC                    |
|-----------|------------------------|------------------------|------------------------|-------------------------|-------------------------|-------------------------|-------------------------|-------------------------|-------------------------|-------------------------|-------------------------|-------------------------|
| FPG       | r = 0.517<br>p < 0.001 | r = 0.493<br>p < 0.001 | r = 0.001<br>p = 0.994 | r = 0.017<br>p = 0.627  | r = -0.037<br>p = 0.488 | r = 0.172<br>p = 0.056  | r = 0.040<br>p = 0.250  | r = 0.007<br>p = 0.841  | r = -0.011<br>p = 0.756 | r = -0.062<br>p = 0.076 | r = -0.002<br>p = 0.960 | r = 0.119<br>p < 0.001  |
| A1C-Roche | -                      | r = 0.905<br>p < 0.001 | r = 0.023<br>p = 0.497 | r = -0.007<br>p = 0.844 | r = -0.050<br>p = 0.350 | r = 0.176<br>p = 0.051  | r = 0.193<br>p < 0.001  | r = 0.112<br>p = 0.001  | r = 0.121<br>p < 0.001  | r = -0.117<br>p < 0.001 | r = -0.093<br>p < 0.001 | r = 0.028<br>p = 0.414  |
| A1C-CE    | -                      | -                      | r = 0.273<br>p < 0.001 | r = -0.146<br>p < 0.001 | r = -0.426<br>p < 0.001 | r = 0.108<br>p = 0.236  | r = 0.146<br>p < 0.001  | r = 0.139<br>p < 0.001  | r = 0.152<br>p < 0.001  | r = 0.012<br>p = 0.738  | r = 0.026<br>p = 0.459  | r = 0.036<br>p = 0.305  |
| %HbA      | -                      | -                      | -                      | r = -0.359<br>p < 0.001 | r = -0.993<br>p < 0.001 | r = -0.072<br>p = 0.429 | r = -0.172<br>p < 0.001 | r = 0.101<br>p = 0.004  | r = 0.117<br>p < 0.001  | r = 0.508<br>p < 0.001  | r = 0.454<br>p < 0.001  | r = -0.021<br>p = 0.550 |
| %HbA2     | -                      | -                      | -                      | -                       | r = 0.766<br>p < 0.001  | r = 0.115<br>p = 0.203  | r = 0.065<br>p = 0.059  | r = -0.050<br>p = 0.151 | r = -0.067<br>p = 0.055 | r = -0.225<br>p < 0.001 | r = -0.197<br>p < 0.001 | r = 0.024<br>p = 0.496  |
| %HbE      | -                      | -                      | -                      | -                       | -                       | r = 0.235<br>p < 0.001  | r = 0.217<br>p < 0.001  | r = -0.101<br>p = 0.064 | r = -0.095<br>p = 0.080 | r = -0.586<br>p < 0.001 | r = -0.541<br>p < 0.001 | r = 0.001<br>p = 0.999  |
| %HbF      | -                      | -                      | -                      | -                       | -                       | -                       | r = 0.005<br>p = 0.961  | r = -0.138<br>p = 0.137 | r = -0.124<br>p = 0.137 | r = -0.212<br>p < 0.001 | r = -0.226<br>p < 0.001 | r = -0.047<br>p = 0.613 |
| RBC count | -                      | -                      | -                      | -                       | -                       | -                       | -                       | r = 0.674<br>p < 0.001  | r = 0.839<br>p < 0.001  | r = -0.300<br>p < 0.001 | r = -0.343<br>p < 0.001 | r = -0.166<br>p < 0.001 |
| Hb        | -                      | -                      | -                      | -                       | -                       | -                       | -                       | -                       | r = 0.806<br>p < 0.001  | r = 0.201<br>p < 0.001  | r = 0.215<br>p < 0.001  | r = 0.088<br>p = 0.011  |
| Hct       | -                      | -                      | -                      | -                       | -                       | -                       | -                       | -                       | -                       | r = 0.245<br>p < 0.001  | r = 0.134<br>p < 0.001  | r = -0.168<br>p < 0.001 |
| MCV       | -                      | -                      | -                      | -                       | -                       | -                       | -                       | -                       | -                       | -                       | r = 0.889<br>p < 0.001  | r = 0.026<br>p = 0.454  |
| MCH       | -                      | -                      | -                      | -                       | -                       | -                       | -                       | -                       | -                       | -                       | -                       | r = 0.472<br>p < 0.001  |
